# Supplementary material for: How C: N: P stoichiometry in soils and carbon distribution in plants respond to forest age in a Pinus tabuliformis plantation in the mountainous area of eastern Liaoning Province, China
Source: PeerJ. 2021 Jul 26;9:e11873. doi: 10.7717/peerj.11873 (PMC8320515; doi:10.7717/peerj.11873)
Supplement: Supplemental Information 1 [file peerj-09-11873-s001.xlsx]

## Sheet: Sheet2
	carbon content									Soil
	Leaf	Branch	Trunk	fine root(0.5 m)			fine root(1 m)			Soil TC	Soil TN	Soil TP	Soil AP	Soil TC:TN	Soil TC:TP	Soil TN:TP
				20cm	40cm	60cm	20cm	40cm	60cm
YF	488.8	473.3	511.04	465.08	463.22	449.95	467.28	413.25	401.09	19.47	1.15	0.598946	16.9062	16.9304	32.5071	1.92004
	489.8	471.8	501.15	465.33	468.69	434.2	472.9	447.6	452.5	15.66	0.9	0.427492	14.2187	17.4	36.6323	2.1053
	492.5	476.9	468.98	461.08	457.31	452.23	477.7	467.8	443	11.25	0.69	0.27638	17.0137	16.3043	40.7048	2.49656
MAF	509	333.8	502.4	483.1	456.2	442.1	474.4	473.8	466.3	18.19	1.27	0.418774	14.9175	14.3228	43.4363	3.03266
	504.8	334.4	513.7	472.5	447.6	457.6	464.4	457.2	460.3	17.46	1.15	0.39262	15.455	15.1826	44.4705	2.92904
	503.9	336.8	493.4	483.3	472.5	460.4	441.04	474.19	430.94	34.35	2.09	0.526296	13.7888	16.4354	65.2675	3.97115
NMF	505.6	333.6	488.3	446.1	455.8	446.5	458.2	424.5	440.4	23.94	1.33	0.42168	13.735	18	56.7729	3.15405
	503.6	334.4	488.7	483.6	459.3	468.7	485.8	451.9	451.9	15.77	1.01	0.505954	15.9925	15.6139	31.1688	1.99623
	502.9	338.4	492.6	465.7	455.2	446.2	470.2	466.1	465.8	24.27	1.41	0.357748	16.4762	17.2128	67.8411	3.94132
MF	496	324.2	512.9	471.6	466.5	463.1	458.6	449	455.3	28.77	2.24	0.735528	14.2725	12.8438	39.1148	3.04543
	495.5	332.5	517.8	451	462.5	465.7	466.27	459.11	434.94	21.1	1.41	0.380996	13.5738	14.9645	55.3812	3.70083
	502	330.8	498.5	466.7	464.3	458.2	482.7	464.1	460.7	12.51	0.83	1.13656	18.5725	15.0723	11.0069	0.730276
OMF	507.8	336.7	499.9	477.9	445.1	422.6	477.6	436.1	415.3	37.82	2.95	1.08425	16.4762	12.8203	34.8813	2.72078
	504.5	335.5	511.8	465.4	445.6	442.4	470.2	466.1	465.8	20.97	1.4	1.32254	16.745	14.9786	15.8559	1.05857
	501	333.3	503	458.6	449	455.3	464.7	464.6	451.8	20.24	1.38	0.79946	17.5513	14.6667	25.3171	1.72617
